# Supplementary material for: Mycorrhizal association controls soil carbon-degrading enzyme activities under nitrogen addition: Implications for soil carbon dynamics
Source: Research Square preprint supplement (doi:10.21203/rs.3.rs-2315779/v1), 2022-12-02
Supplement: Supplementary file 1 [file 2b5064a5e7dc497af99ce0eb.xlsx]

## Sheet: Table S1 
Table S1 List of the dominant plant species and their associated mycorrhizal types from selected references in this study. ECM: ectomycorrhiza; AM: arbuscular mycorrhiza.
Reference	Dominant plant species	Mycorhiza type
Allison et al., 2008	Picea mariana	ECM
Bai et al., 2012	Herbs	AM
Chen et al., 2019	Herbs	AM
Chung et al., 2007	Grasses	AM
DeForest et al., 2005	Acer saccharum	AM
Drake et al., 2012	Pinus taeda	ECM
Frey et al., 2004	Quercus velutina; Q. rubra	ECM
Frey et al., 2004	Pinus resinosa; Quercus velutina; Q. rubra	ECM
Gallo et al., 2004	Acer saccharum; Quercus rubra	ECM
Gallo et al., 2004	Quercus velutina; Q. alba	ECM
Gao et al., 2017	Cunninghamia lanceolata	AM
Grandy et al., 2008	Quercus velutina; Q. alba	ECM
Guo et al., 2020	Pinus tabuliformis; Quercus wutaishanica; Betula platyphylla; Populus davidiana	ECM
Jing et al., 2016	Herbs	AM
Jing et al., 2017	Pinus koraiensi	ECM
Jing et al., 2017	Castanopsis carlesii	ECM
Jing et al., 2017	Pinus koraiensi	ECM
Jung et al., 2011	Herbs	AM
Keeler et al., 2009	Herbs	AM
Keeler et al., 2009	Populus grandidentata	ECM
Keeler et al., 2009	Quercus ellipsoidalis	ECM
Keeler et al., 2009	Pinus strobus	ECM
Li et al., 2021	Quercus liaotungensis	ECM
Liu et al., 2019	Herbs	AM
Liu et al., 2019a	Larix mastersiana	ECM
Liu et al., 2015	Pinus tabulaeformis	ECM
Lu et al., 2013	Pinus massoniana	ECM
Lu et al., 2013	Quercus variabilis	ECM
Luo et al., 2017	Kandelia obovota	AM
Luo et al., 2017	Herbs	AM
Luo et al., 2020	Herbs	AM
Ma et al., 2019	Larix gmelinii	ECM
Nemergut et al., 2008	Herbs	AM
Nowinski et al., 2009	Pinus ponderosa; P. jeffreyi	ECM
Peng et al., 2017	Phyllostachys edulis	AM
Qin et al., 2021	Herbs	AM
Ren et al., 2014	Pinus koraiensis	ECM
Shen et al., 2012	Cunninghamia lanceolata	AM
Sinsabaugh et al., 2005	Quercus velutina; Q. alba	ECM
Stursova et al., 2006	Herbs	AM
Sun et al., 2016	Pinus tabuliformis; Quercus mongolica	ECM
Thomas et al., 2012	Acer saccharum	AM
Tiemann et al., 2011	Herbs	AM
Tu et al., 2009	Pleioblastus amarus	AM
Tu et al., 2012	Betula luminifera	ECM
Waldrop et al., 2004a	Quercus velutina; Q. alba	ECM
Wang et al., 2020	Herbs	AM
Wang et al., 2017	Larix gmelinii	ECM
Wu et al., 2019	Larix principis-rupprechtii	ECM
Xu et al., 2020	Herbs	AM
Xuan et al., 2014	Moso bamboo	AM
Yang et al., 2018	Larix gmelinii	ECM
Yang et al., 2014	Larix gmelinii	ECM
Yuan et al., 2012	Cunninghamia lanceolata	AM
Yuan et al., 2013	Cunninghamia lanceolata	AM
Zhang et al., 2017	Quercus liaotungensis	ECM
Zhao et al., 2008	Populus davidiana; Betula platyphylla	ECM
Zhao et al., 2008	Pinus koraiensis	ECM
Zhou et al.,2017	Castanopsis carlesii	ECM
Jiang et al., 2021	Pinus tabulaeformis	ECM
Huang et al., 2021	Herbs	AM
Rappe-George et al., 2017	Picea abies	ECM
Rappe-George et al., 2017	Pinus sylvestris	ECM
Weand et al., 2010	Fagus grandifolia	ECM
Weand et al., 2010	Tsuga canadensis	ECM
Weand et al., 2010	Acer saccharum	AM
Weand et al., 2010	Quercus rubra	ECM
Weand et al., 2010	Betula alleghaniensis	ECM
Zeglin et al., 2007	Herbs	AM
Freedman et al., 2016	Acer saccharum	AM
Kunito et al., 2009	Larix kaempferi	ECM
