# Supplementary material for: Mycorrhizal association controls soil carbon-degrading enzyme activities under nitrogen addition: Implications for soil carbon dynamics
Source: Research Square preprint supplement (doi:10.21203/rs.3.rs-2315779/v1), 2022-12-02
Supplement: Supplementary file 2 [file 528388be46a666cad4239c46.doc]

**Supporting information**

**Mycorrhizal association controls soil carbon-degrading enzyme activities under nitrogen addition: Implications for soil carbon dynamics**

Yuanliu Hu1,2,3,4, Ji Chen4,5,6**, Jørgen E. Olesen4,5,6, Kees Jan van Groenigen7, Dafeng Hui8, Xinhua He9,10, Guoying Chen1,2,3, Qi Deng1,2*

*1 Key Laboratory of Vegetation Restoration and Management of Degraded Ecosystems, South China Botanical Garden, Chinese Academy of Sciences, Guangzhou, Guangdong 510650, China*

*2 Guangdong Provincial Key Laboratory of Applied Botany, South China Botanical Garden, Chinese Academy of Sciences, Guangzhou, Guangdong 510650, China*

*3 University of Chinese Academy of Sciences, Beijing 100039, China*

*4 Department of Agroecology, Aarhus University, 8830 Tjele, Denmark*

*5 Aarhus University Centre for Circular Bioeconomy, Aarhus University, 8830 Tjele, Denmark*

*6 iCLIMATE Interdisciplinary Centre for Climate Change, Aarhus University, 4000 Roskilde, Denmark*

*7 Department of Geography, College of Life and Environmental Sciences, University of Exeter, Exeter, UK*

*8 Department of Biological Sciences, Tennessee State University, Nashville, TN 37209, USA*

9 *Chongqing Key Laboratory of Plant Resource Conservation and Germplasm Innovation, Integrative Science Center of Germplasm Creation in Western China (Chongqing) Science City, School of Life Sciences, Southwest University, Chongqing 400715, China*

10 *School of Biological Sciences, University of Western Australia, Perth, WA 6009, Australia*

***Author for correspondence:** [dengqi@scbg.ac.cn](mailto:dengqi@scbg.ac.cn) (Qi Deng)

****Author for correspondence:** ji.chen@agro.au.dk (Ji Chen)

**1 | PRISMA-flowchart of assessment of eligible studies**

**Records identified**

**through database search**

[Web of Science (WOS), 2018~2022, based on the keywords from the method section, *n* = 71]

**Records identified through other sources**
[Google Scholar, 2018~2022, using the same keywords as used in WOS, *n* = 45]

**Identification**

**Records identified**

**through database search**

[China National Knowledge Infrastructure (CNKI), 2018~2022, based on the keywords from the method section, *n* = 28]

**Screening**

**Records excluded**
(*n* = 138, 6 of these papers books and conference proceedings, and review articles are excluded)

**Records screened**

(*n* = 199)

**Records identified through original database**

[Chen *et al.* (2018), 1980~2018, *n* = 61]

**Records after duplicates excluded**
[*n* = 149, 61 from Chen *et al.* (2018), 58 from WOS, 16 from CNKI, 14 from Google Scholar]

**Eligibility**

**Observations excluded, with reasons**
(*n* = 152)

(1) Duplicate reports of the same studies

(2) Measurements with soil sampling depth below 20 cm

(3) N addition studies with other nutrients inputs or other treatments.

**Full-text articles assessed for eligibility**
(*n* = 59)

Eligibility requirements: (1) field experiments in natural grasslands and forest ecosystems; (2) simultaneously at least one kind of hydrolase and ligninase activities; (3) the dominant mycorrhizal type can be clearly identified in each experimental site; (4) details on N addition methods (fertilization rate, frequency, form, and duration) are provided

**Studies included in qualitative synthesis**
(*n* = 59)

**Included**

**Studies included in meta-analysis**
A total of 59 papers were included in this meta-analysis, including 84 independent field experiments of N addition, 152 observations.

**2 | Supplementary Figures**


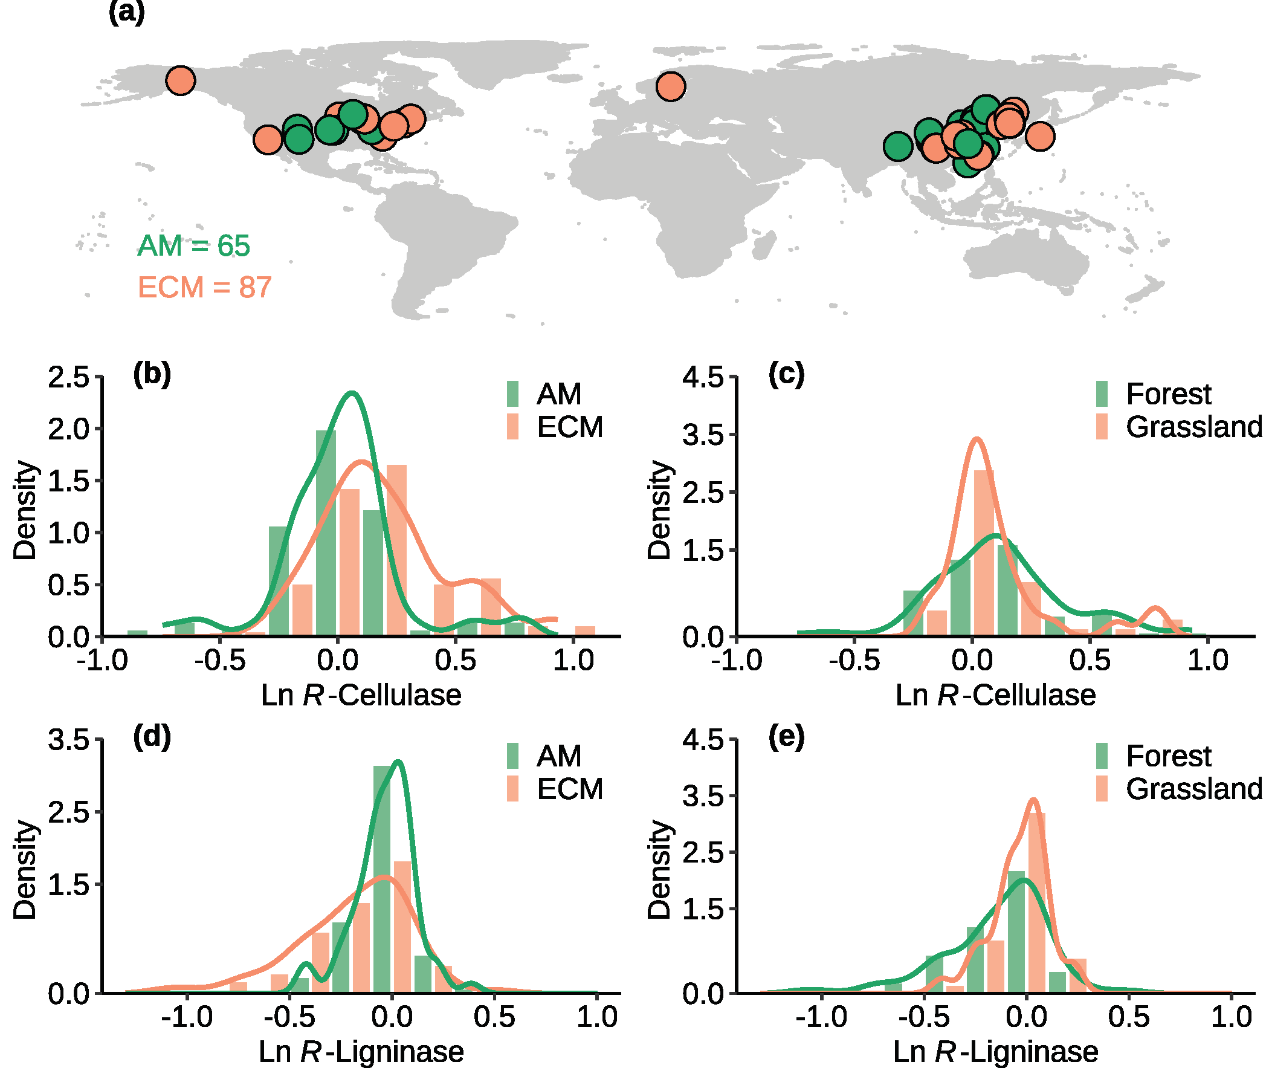


**Figure S1 Distribution of nitrogen addition experiments in this meta-analysis (a). Density distribution of the response of cellulase (b, c) and ligninase (d, e) activities to nitrogen addition when studies were grouped by mycorrhiza and vegetation type.** Ln *R*: the response ratios; ECM: ectomycorrhizal; AM: arbuscular mycorrhiza.

**
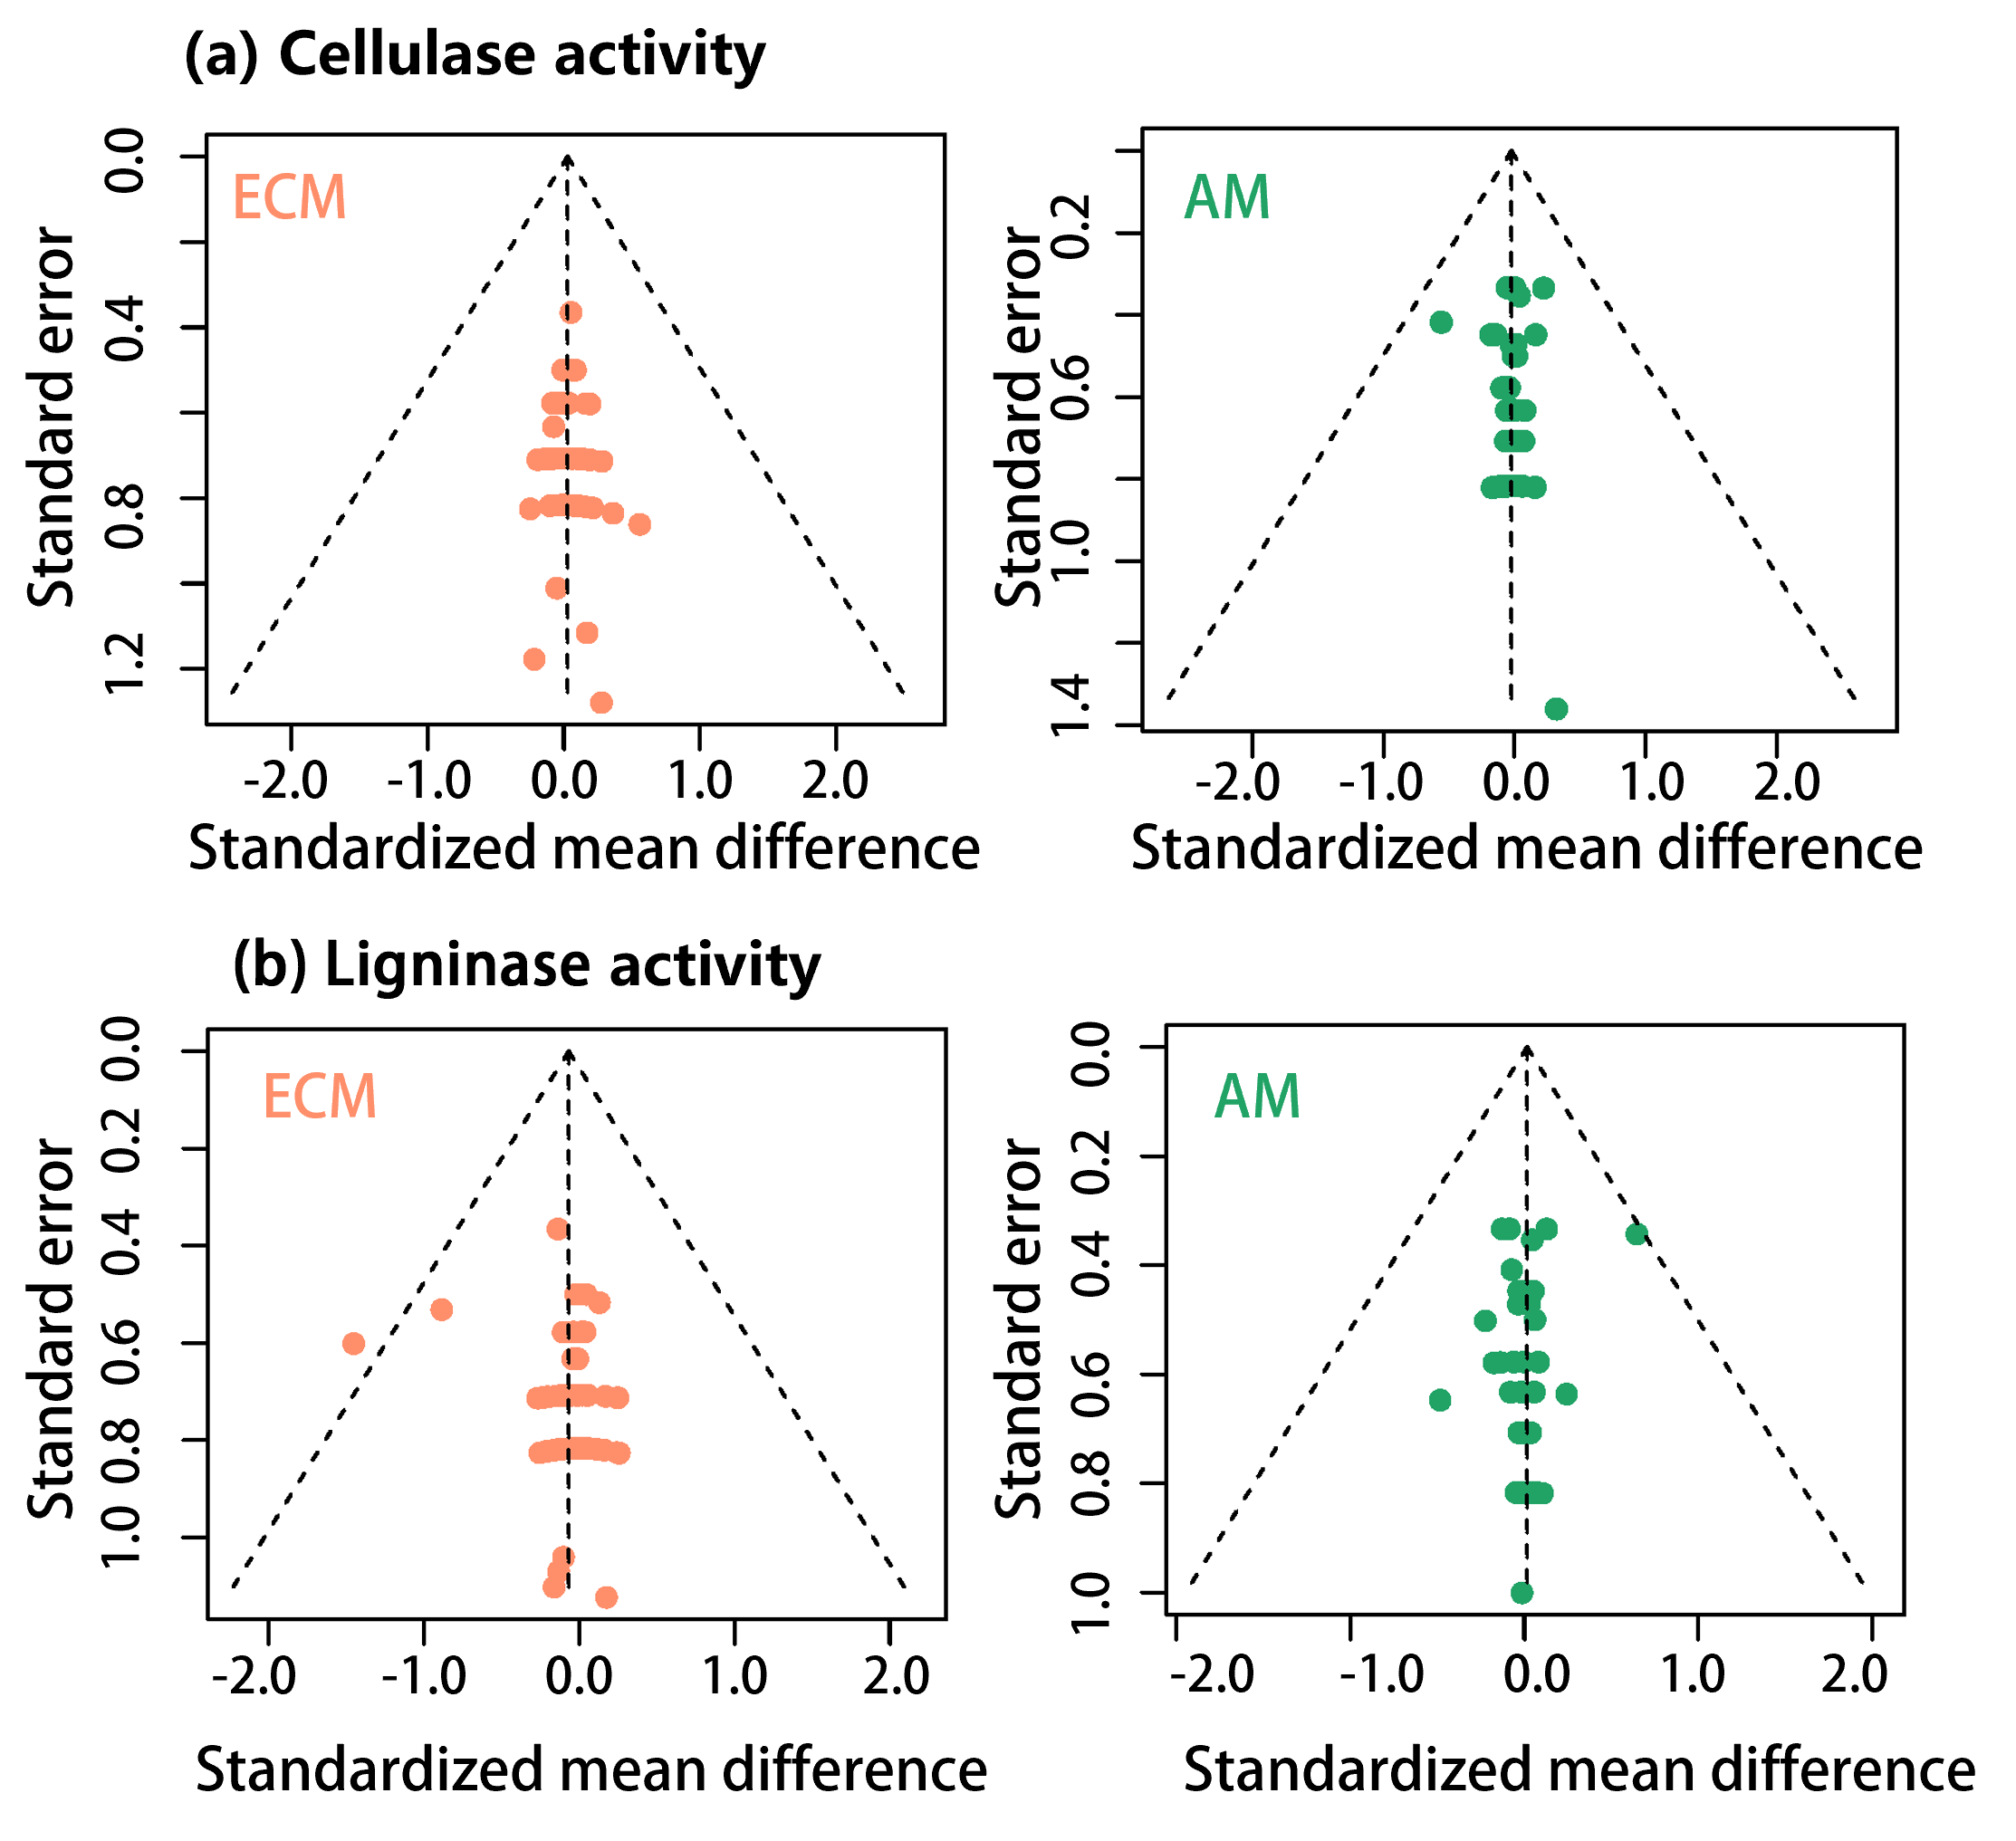
**

**Figure S2 Funnel plot display the statistical distribution of standard errors for the response ratios of cellulase and ligninase activities to mycorrhizal associations.** ECM: ectomycorrhiza; AM: arbuscular mycorrhiza.


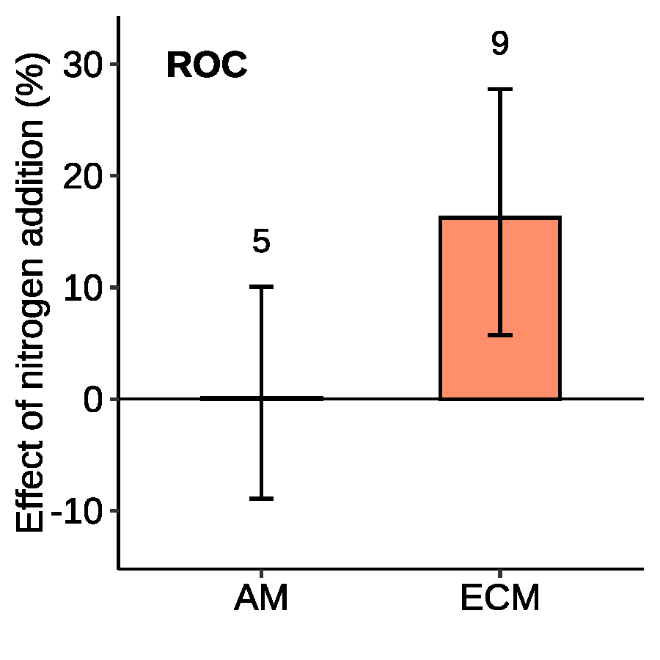


**Figure S3 Meta-analysis of the effect of nitrogen addition on soil recalcitrant organic carbon (ROC) when grouped by arbuscular mycorrhiza (AM) and ectomycorrhiza (ECM).** Error bars represent bootstrap 95% confidence intervals (CIs); the effects of nitrogen addition are considered significant when the 95% CIs do not overlap with zero; the numbers above the error bar indicate sample sizes. The ROC is defined as the carbon content of soil fractions with density > 1.7 g cm-3, soil fractions with size < 53 μm, or the differences between the total carbon pool and the labile carbon pool. The labile carbon is defined as organic carbon readily oxidized by KMnO4, or evolved CO2 of soil slurries that are incubated at 25 °C on a rotary shaker for 30 days.


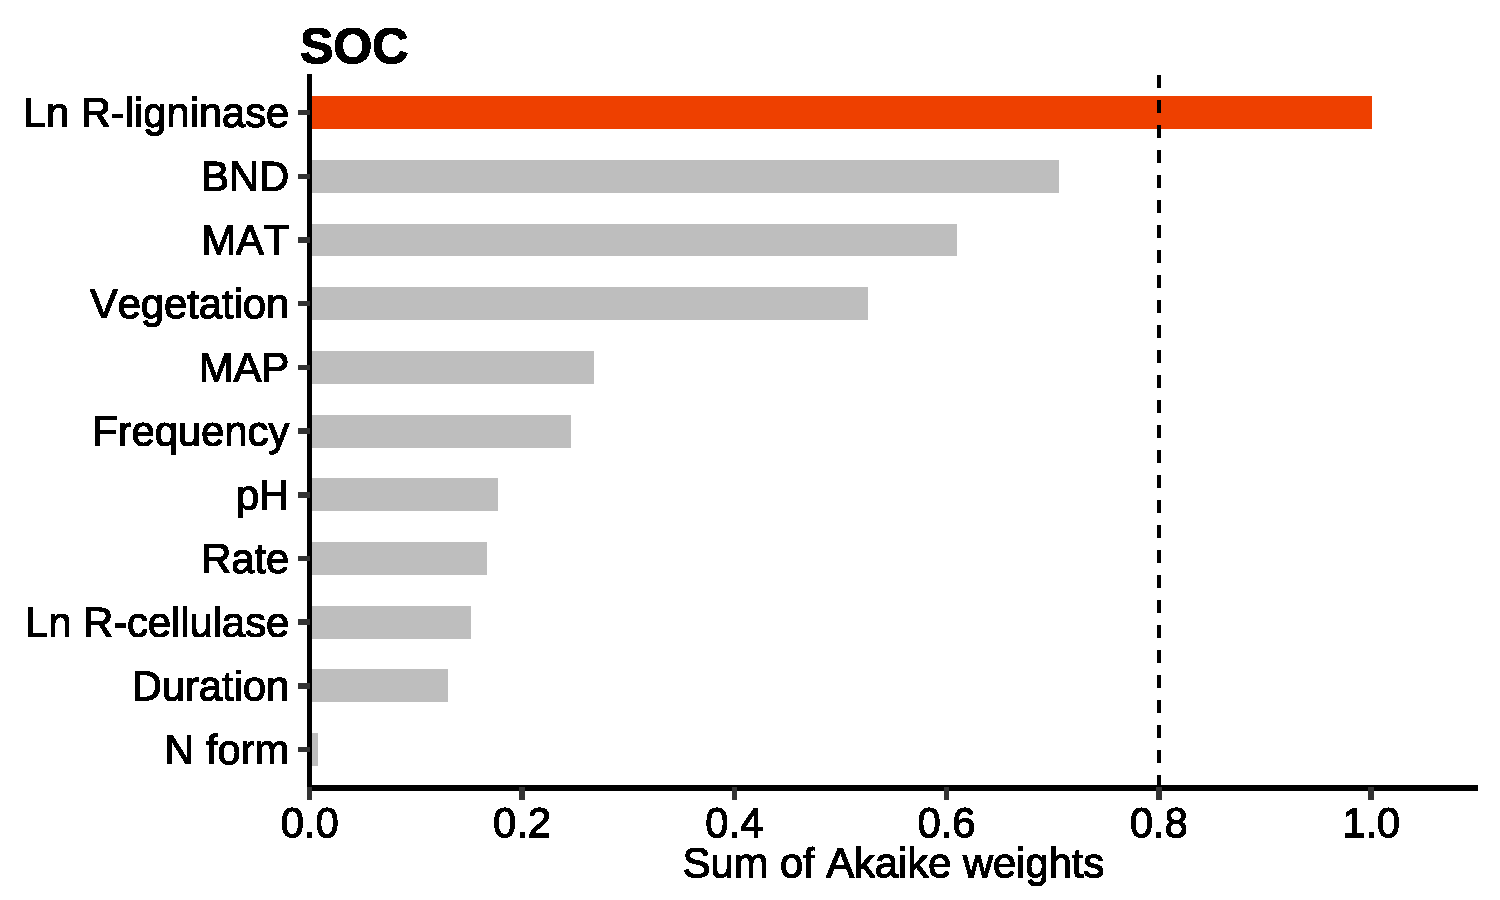


**Figure S4 Model selection analyses identified the response ratio (ln *R*) of ligninase activities as the most important predictor of the response ratio of soil organic carbon (SOC) to nitrogen addition (*n* = 82).** The model-averaged importance of the predictors of the response of cellulase (a) and ligninase (b) activities to N addition. The importance is based on the sum of Akaike weights derived from model selection using AIC (Akaike’s Information Criteria). Cut-off is set at 0.8 (dashed line) to differentiate important from non-essential predictors. Ln *R*-ligninase: the response of ligninase activity; Ln *R*-cellulase: the response of cellulase activity; N: nitrogen; MAT: mean annual temperature; MAP: mean annual precipitation; BND: background nitrogen deposition rates; Rate: N fertilization rate; Frequency: N fertilization frequency; Duration: N fertilization duration.


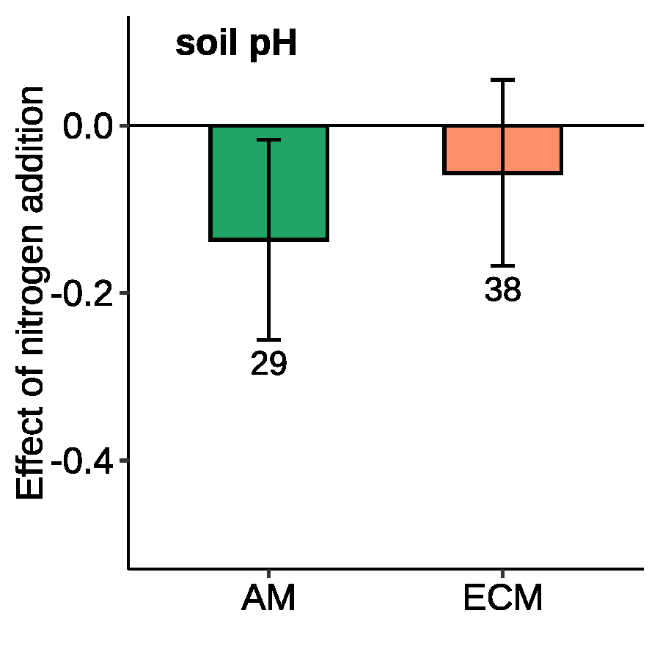


**Figure S5 Meta-analysis of the effect of nitrogen addition on soil pH when grouped by arbuscular mycorrhiza (AM) and ectomycorrhiza (ECM).** Error bars represent bootstrap 95% confidence intervals (CIs); the effects of N addition are considered significant when the 95% CIs do not overlap with zero; the numbers below the error bar indicate sample sizes.


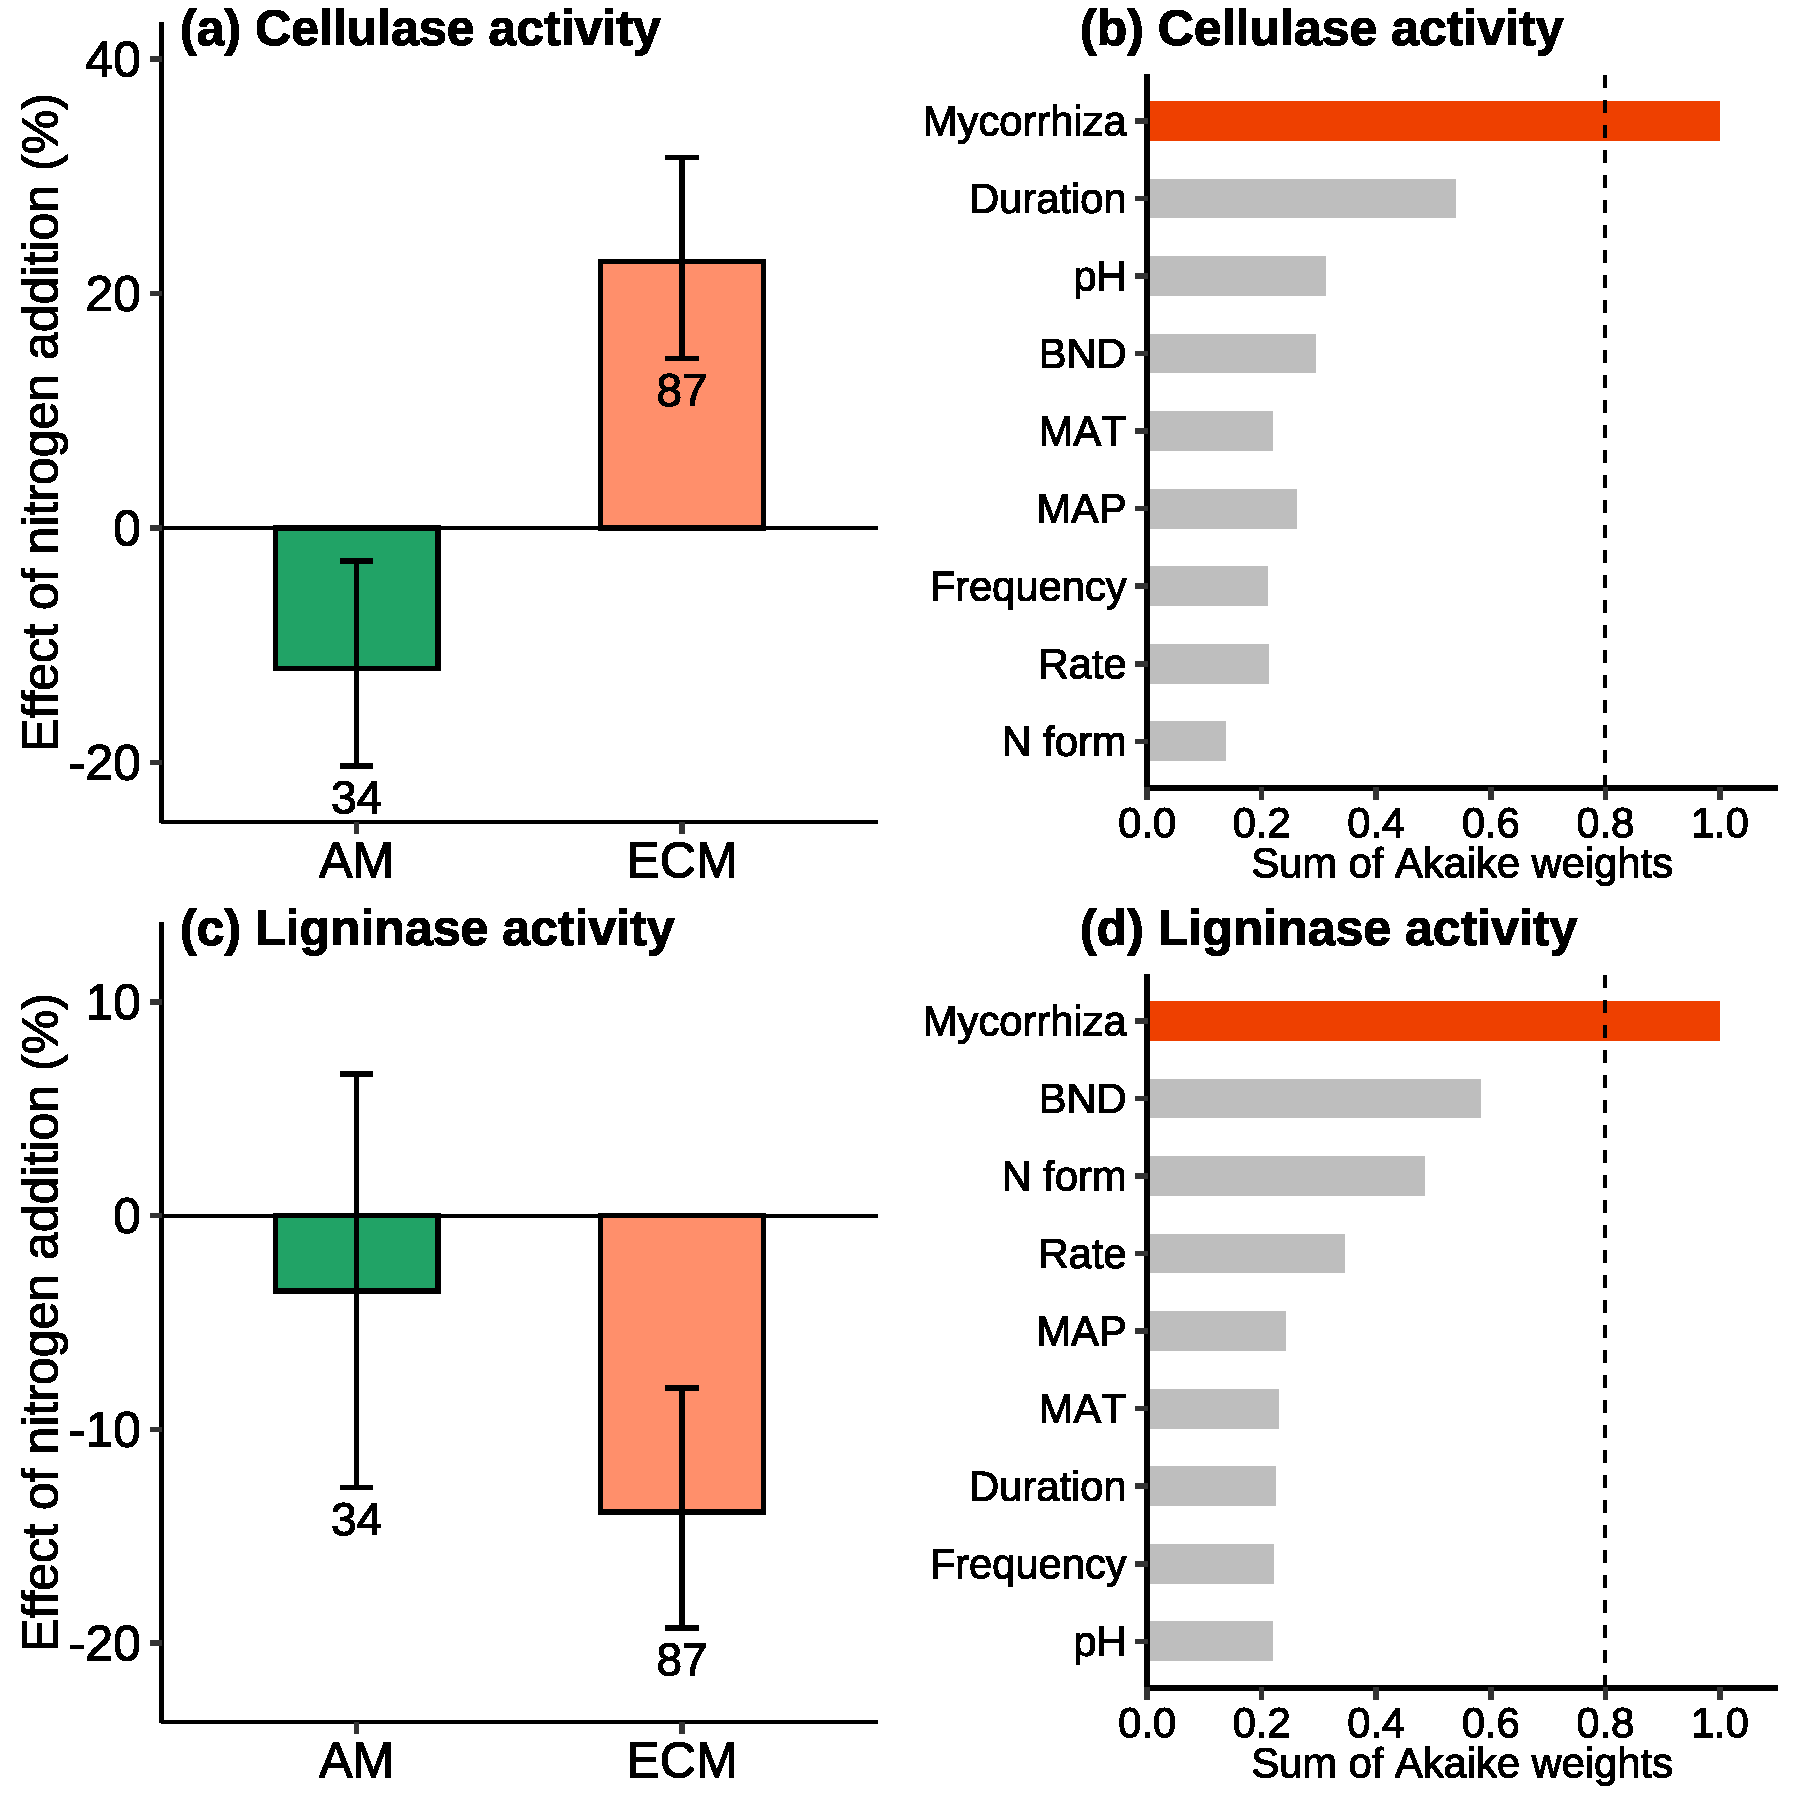


**Figure S6** **Meta-analysis of the effects of nitrogen addition on cellulase and ligninase activities in forest soils. The model selection analyses identified that mycorrhiza type was the only important predictor in both responses of cellulase and ligninase activities to nitrogen addition (*n* = 119).** (a, c) Error bars represent bootstrap 95% confidence interval (CIs); the effects of N addition are considered significant when the 95% CIs do not overlap with zero; the numbers below error bars indicate sample sizes; (b, d) the dashed line shows a cutoff to distinguish important predictors. N: nitrogen; MAT: mean annual temperature; MAP: mean annual precipitation; BND: background nitrogen deposition rates; Rate: N fertilization rate; Frequency: N fertilization frequency; Duration: N fertilization duration; ECM: ectomycorrhizal; AM: arbuscular mycorrhiza.


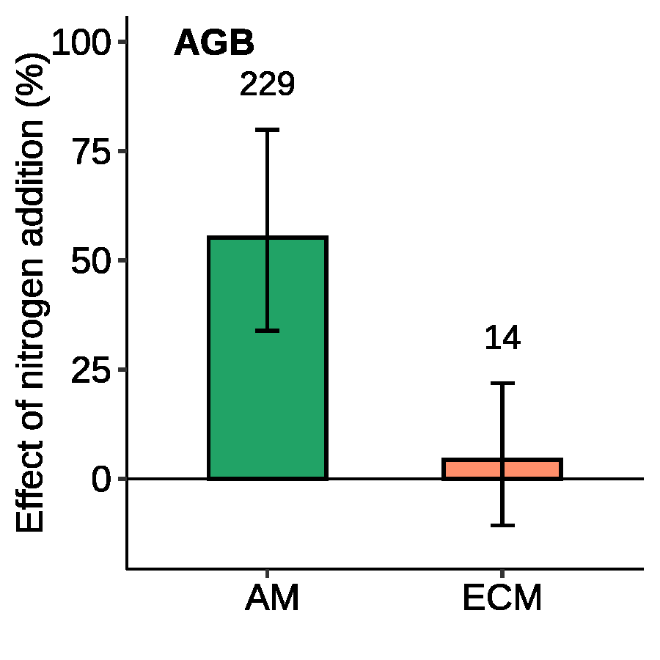


**Figure S7 Meta-analysis of the effect of** **nitrogen addition on percentage plant aboveground biomass (AGB) when grouped by arbuscular mycorrhiza (AM) and ectomycorrhiza (ECM).** Error bars represent bootstrap 95% confidence intervals (CIs); the effects of nitrogen addition are considered significant when the 95% CIs do not overlap with zero; the numbers above the error bar indicate sample sizes. This result is based on the original dataset from [Xu *et al.* (2019)](#Xu2019) after excluding the nitrogen addition studies with unnatural ecosystems or with inputs of other nutrients (e.g., P, K, Ca, compost or slurry additions) or other global change treatments (e.g., CO2, warming or precipitation change). The dominant mycorrhizal type of each study is derived from [Luo *et al.* (2022)](#Luo2022) with an exclusion of those cannot be clearly identified.

**References**

**Luo M, Shi Z, Yang S, Zhang M, Wu S, Zhang M**. **2022**. Mycorrhizal Types Regulated the Responses of Biomass in Different Plant Organs to N Addition. *Agronomy* **12**: 2357.

**Xu X, Lu R, Yan L, Xia J**. **2019**. PlantNE: a global database of plant biomass from nitrogen-addition experiments. *Ecology* **100**: e02840.
